# Supplementary material for: MDM2 is a novel E3 ligase for HIV-1 Vif
Source: PubMed Central journal article supplement (PMC2629459; doi:10.1186/1742-4690-6-1), 2009-01-07
Supplement: 1742-4690-6-1-S1.pdf [file 1742-4690-6-1-S1.pdf]

**CHX treatment time (min)**

**0 30 60 90 120 150**

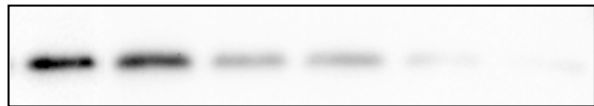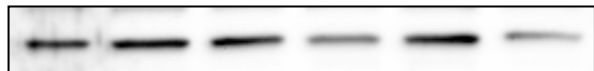

**p53-/- MEF**

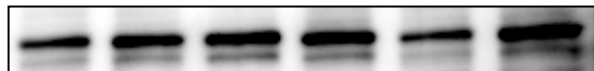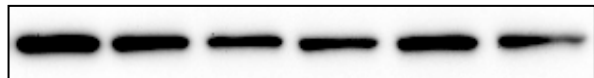

**CHX treatment time (min)**

**0 30 60 90 120 150**

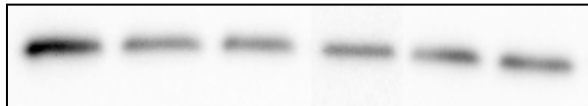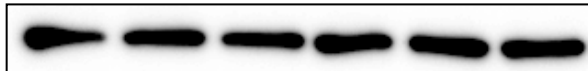

**p53-/-MDM2-/- MEF**

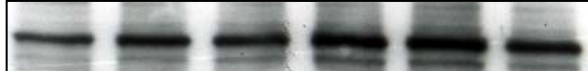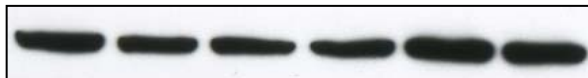

**Vif**

**β-actin**

**APOBEC3G**

**β-actin**
