# Supplementary material for: MDM2 is a novel E3 ligase for HIV-1 Vif
Source: PubMed Central journal article supplement (PMC2629459; doi:10.1186/1742-4690-6-1), 2009-01-07

**A**

|          |   |   |   |   |
|----------|---|---|---|---|
| His-Cul5 | - | + | - | - |
| His-MDM2 | - | - | - | + |
| GST-Vif  | + | + | + | + |
| E1/ATP   | + | + | + | + |
| E2       | + | + | + | + |
| GST-Ub   | + | + | + | + |

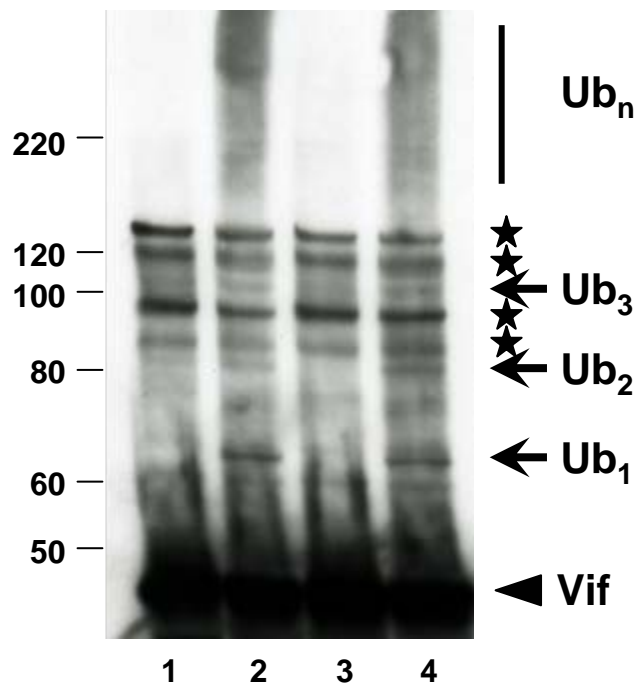**B**

|                     |   |   |   |   |
|---------------------|---|---|---|---|
| His-MDM2            | - | + | - | + |
| GST-Vif $\Delta$ 22 | + | + | - | - |
| GST-Vif             | - | - | + | + |
| E1/ATP              | + | + | + | + |
| E2                  | + | + | + | + |
| GST-Ub              | + | + | + | + |

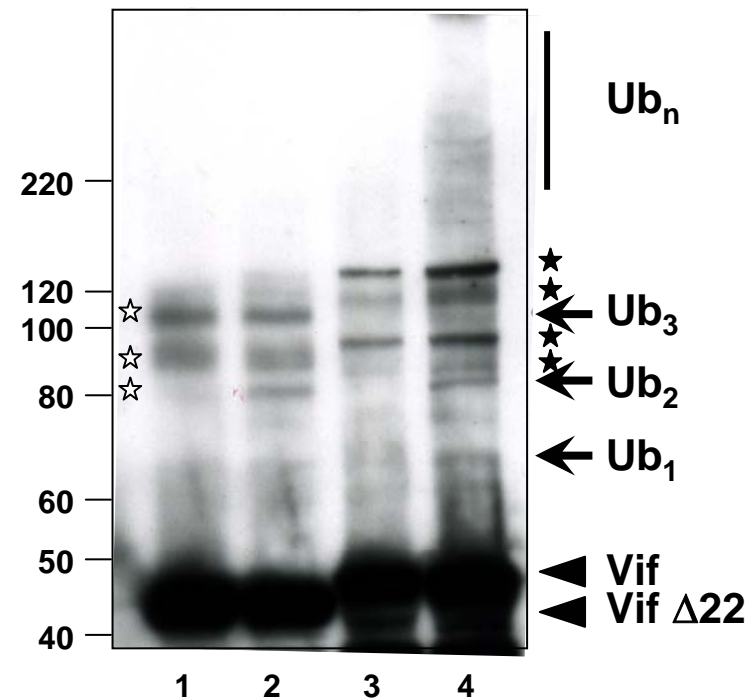

Supplement: 1742-4690-6-1-S2.pdf [file 1742-4690-6-1-S2.pdf]
