# Supplementary material for: MDM2 is a novel E3 ligase for HIV-1 Vif
Source: PubMed Central journal article supplement (PMC2629459; doi:10.1186/1742-4690-6-1), 2009-01-07

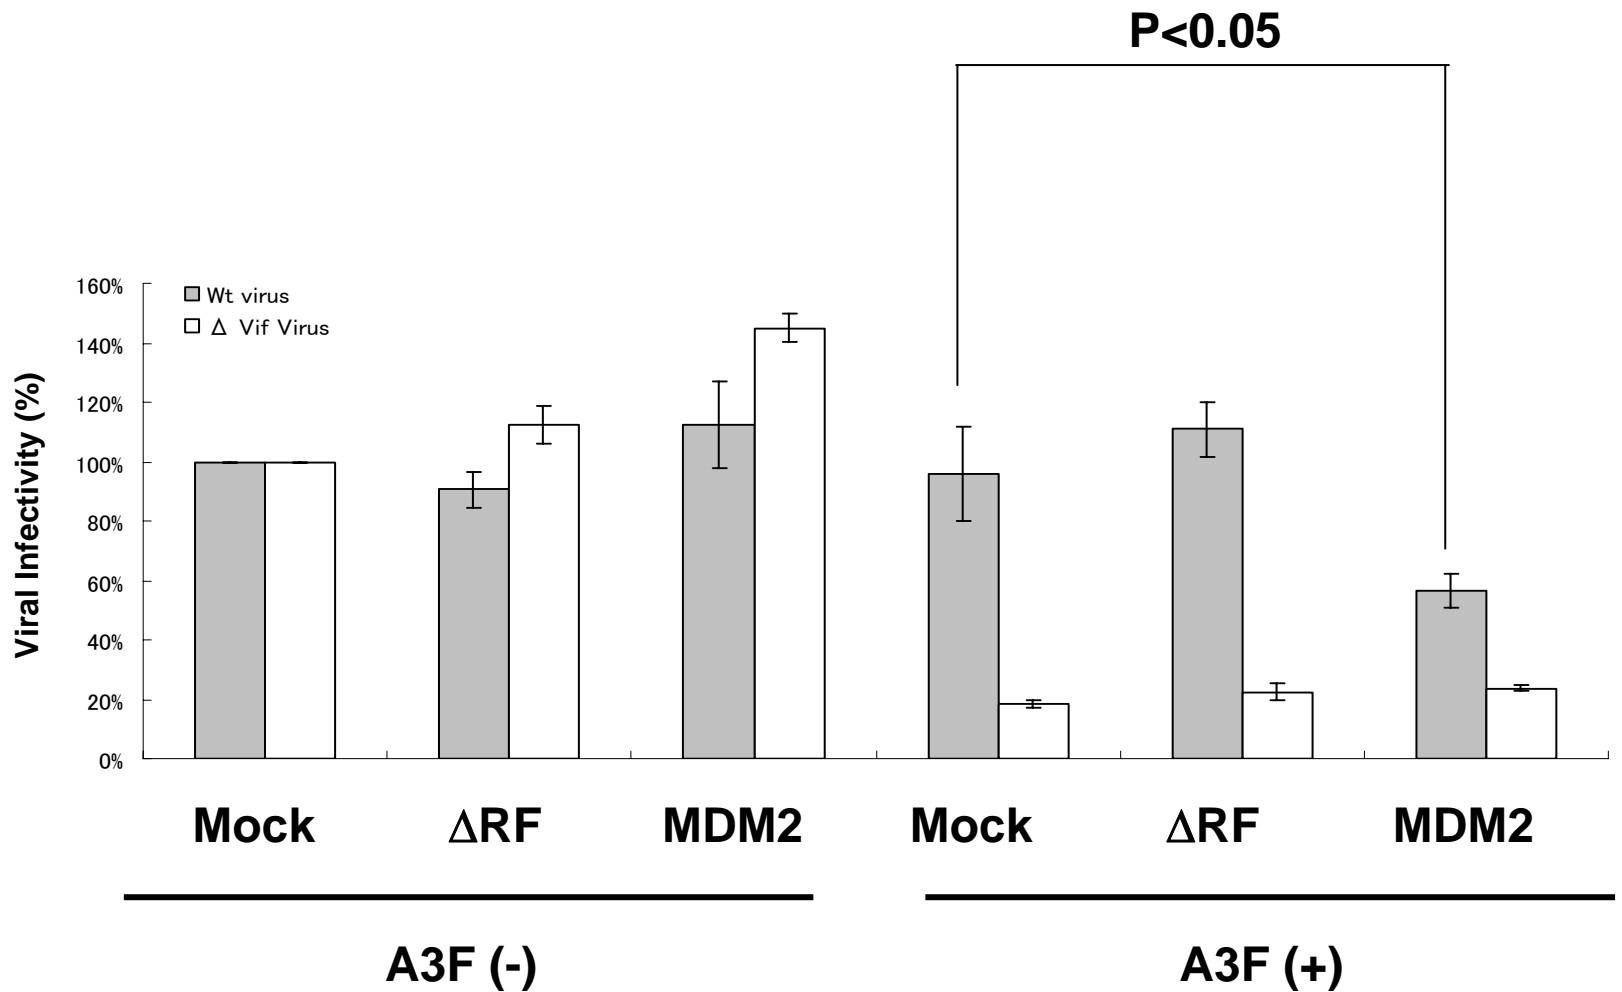

Supplement: 1742-4690-6-1-S3.pdf [file 1742-4690-6-1-S3.pdf]
